# Supplementary material
Source: publisher figshare collection journal article supplement (https://karger.figshare.com/ndownloader/files/24094034)
Supplement: Supplementary file 1 [file 24094034]

SUPPLEMENTAL MATERIAL

Supplemental Table 1. Multivariable adjusted odds of proportion of follow-up time spent hospitalized, with trinary surprise question response

|  | Odds ratio (95% confidence interval) |
| --- | --- |
| Age (78 vs. 66 yrs) | 1.01 (0.70-1.45) |
| Women | 1.27 (0.86-1.89) |
| Black | 1.13 (0.69-1.85) |
| Marital status (vs. married) |  |
| Divorced / separated | **2.19 (1.27-3.78)** |
| Widowed | 1.17 (0.70-1.94) |
| Single | 1.09 (0.41-2.85) |
| Insurance type (private vs. non-private) | 1.18 (0.71-1.98) |
| Charlson Comorbidity Index (7 vs. 4) | **1.34 (1.02-1.76)** |
| Number of current prescription medications (11 vs. 7) | **1.56 (1.20-2.03)** |
| Body mass index (34 vs. 25 kg/m2) | **0.72 (0.54-0.96)** |
| Laboratory values |  |
| eGFR (26 vs. 16 mL/min/1.73 m2) | 0.78 (0.59-1.02) |
| Serum albumin (4.2 vs. 3.7) g/dL | **0.66 (0.54-0.81)** |
| Hemoglobin (12.7 vs. 10.5 g/dL) | 0.90 (0.69-1.17) |
| Days spent hospitalized in prior 1 yr (5 vs. 0) | 1.10 (0.84-1.45) |
| Surprise question response (vs. surprised) |  |
| Not surprised | **2.09 (1.28-3.40)** |
| Neutral | **1.98 (1.24-3.18)** |

For continuous variables, odds ratios express the odds per an increase equal to the variable’s interquartile range.

Supplemental Table 2. Multivariable adjusted hazard ratios for time to first hospitalization

|  | Hazard ratio (95% confidence interval) |
| --- | --- |
| Age (78 vs. 66 yrs) | 0.98 (0.76-1.26) |
| Women | 0.97 (0.73-1.29) |
| Black | 0.97 (0.68-1.40) |
| Marital status (vs. married) |  |
| Divorced / separated | **2.10 (1.43-3.09)** |
| Widowed | 0.93 (0.65-1.33) |
| Single | 1.24 (0.61-2.50) |
| Insurance type (private vs. non-private) | 0.97 (0.65-1.43) |
| Charlson Comorbidity Index (7 vs. 4) | 1.05 (0.86-1.29) |
| Number of current prescription medications (11 vs. 7) | **1.34 (1.10-1.63)** |
| Body mass index (34 vs. 25 kg/m2) | 0.84 (0.69-1.02) |
| Laboratory values |  |
| eGFR (26 vs. 16 mL/min/1.73 m2) | 0.85 (0.69-1.04) |
| Serum albumin (4.2 vs. 3.7) g/dL | **0.75 (0.66-0.85)** |
| Hemoglobin (12.7 vs. 10.5 g/dL) | 0.85 (0.70-1.03) |
| Days spent hospitalized in prior 1 yr (3 vs. 0) | 1.06 (0.94-1.21) |
| Surprise question response (vs. very surprised) |  |
| Definitely not surprised | **1.99 (1.14-3.49)** |
| Not surprised | **2.09 (1.35-3.22)** |
| Neutral | **1.72 (1.17-2.51)** |
| Surprised | **1.54 (1.04-2.27)** |

For continuous variables, odds ratios express the odds per an increase equal to the variable’s interquartile range.
